# Supplementary material for: Removal of ions from saline water using N, P co-doped 3D hierarchical carbon architectures via capacitive deionization
Source: Royal Society of Chemistry journal article supplement (doi:10.1039/c8en00652k), 2018-01-01
Supplement: c8en00652k1.pdf [file c8en00652k1.pdf]

*Electronic Supplementary Information*

**Removal of ions from saline water using N, P co-doped 3D hierarchical  
carbon architectures via capacitive deionization**

Jinlong Han, Liyi Shi, Tingting Yan, Jianping Zhang and Dongsong Zhang\*

School of Materials Science and Engineering, Research Center of Nano Science and Technology, Shanghai  
University, No. 99 Shangda Road, Shanghai 200444, PR China.

\*Corresponding authors: E-mail: dszhang@shu.edu.cn.

Table of Contents

|                                                                                                                                                                                                                                                                                                                       |    |
|-----------------------------------------------------------------------------------------------------------------------------------------------------------------------------------------------------------------------------------------------------------------------------------------------------------------------|----|
| Figure S1. TEM images of (a) P-3DHCA, (b) N-3DHCA and (c) 3DHCA.                                                                                                                                                                                                                                                      | S2 |
| Figure S2. Full XPS spectra of various samples.                                                                                                                                                                                                                                                                       | S3 |
| Figure S3. (a) XRD and (b) Raman spectra of NP-3DHCA, P-3DHCA, N-3DHCA and 3DHCA.                                                                                                                                                                                                                                     | S4 |
| Figure S4. (a) CV curves of NP-3DHCA at different scanning rate; (b) the capacitance of NP-3DHCA at different scanning rate; (c) galvanostatic discharge curve of NP-3DHCA at different current density; (d) IR drop of different samples (the red) and IR drop of NP-3DHCA at different current density (the black). | S5 |
| Figure S5. (a) Plots of SAC vs. time and (b) plots of solution conductivity vs. time for NP-3DHCA with different flow rates at 1.2 V and 500 mg/L. (c) Plots of SAC vs. time and (d) plots of solution conductivity vs. time for NP-3DHCA with different initial concentration at 1.2 V and 40 ml/min.                | S6 |
| Table S1. Comparison of $I_D/I_G$ between this work and the reported electrode materials.                                                                                                                                                                                                                             | S7 |
| Table S2. SAC Comparison between reported carbon materials and this work                                                                                                                                                                                                                                              | S8 |

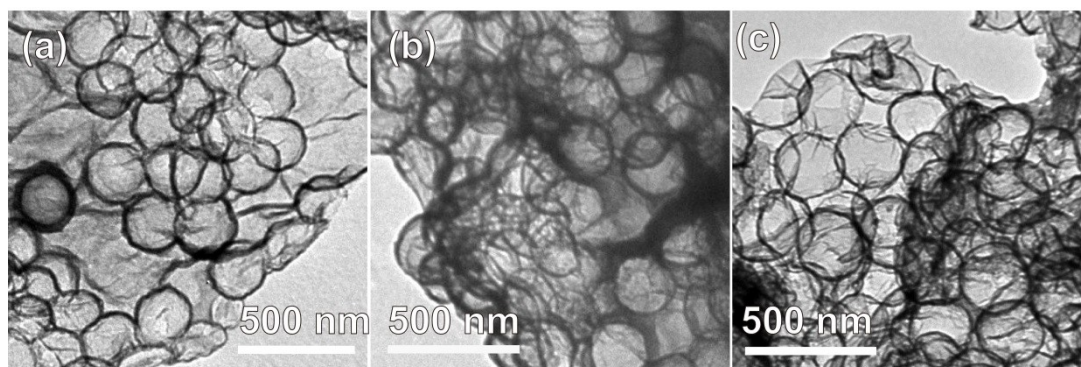

**Figure S1.** TEM images of (a) P-3DHCA, (b) N-3DHCA and (c) 3DHCA.

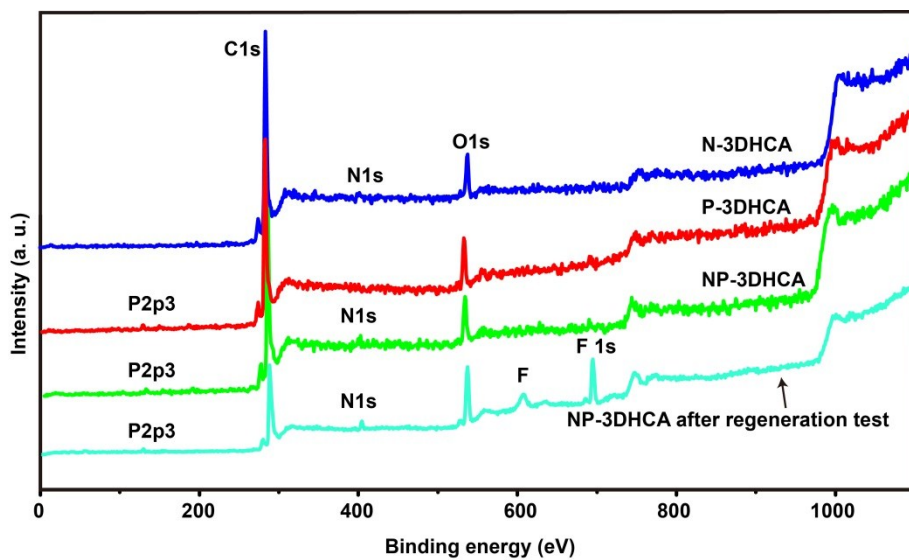

Figure S2. Full XPS spectra of various samples.

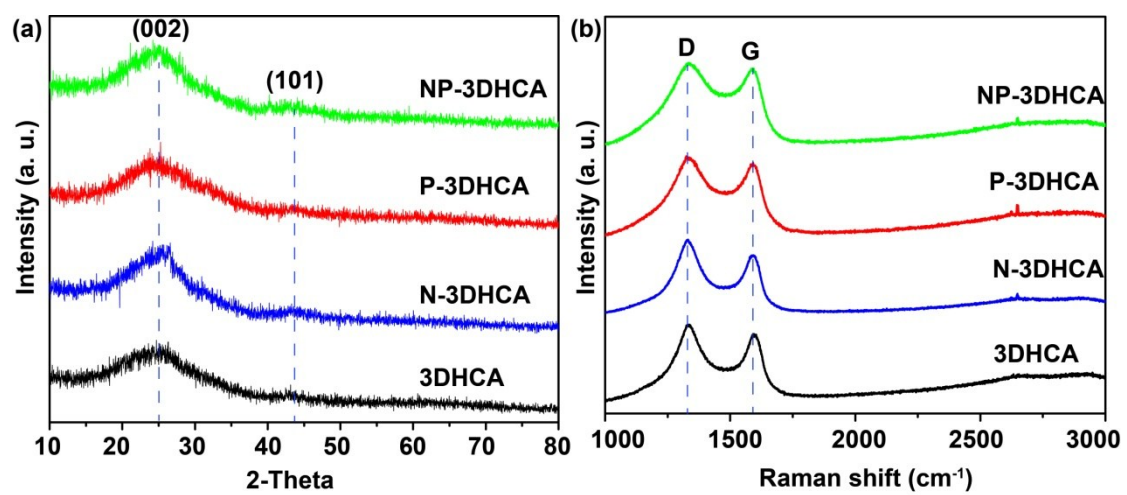

Figure S3. (a) XRD and (b) Raman spectra of NP-3DHCA, P-3DHCA, N-3DHCA and 3DHCA.

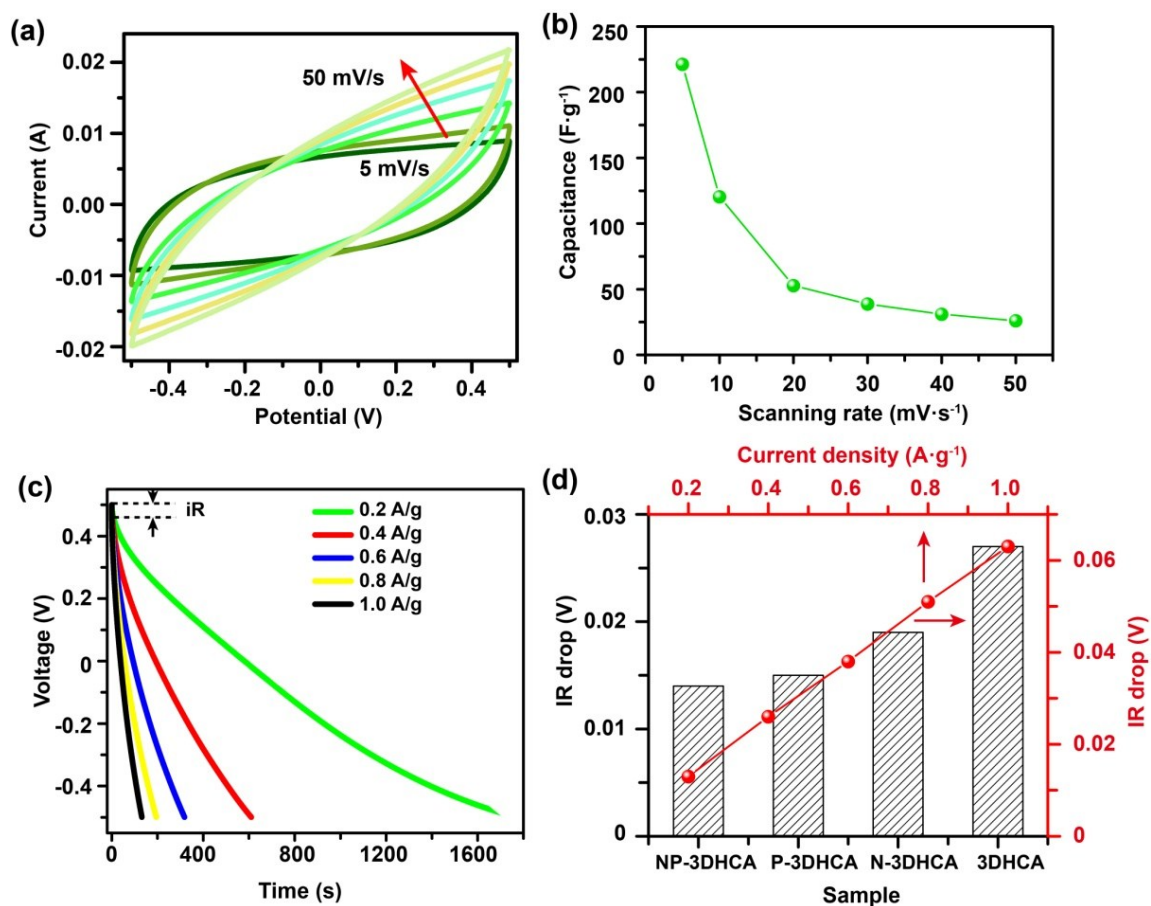

**Figure S4.** (a) CV curves of NP-3DHCA at different scanning rate; (b) Capacitance of NP-3DHCA at different scanning rate; (c) Galvanostatic discharge curve of NP-3DHCA at different current density; (d) IR drop of different samples (the red) and IR drop of NP-3DHCA at different current density (the black).

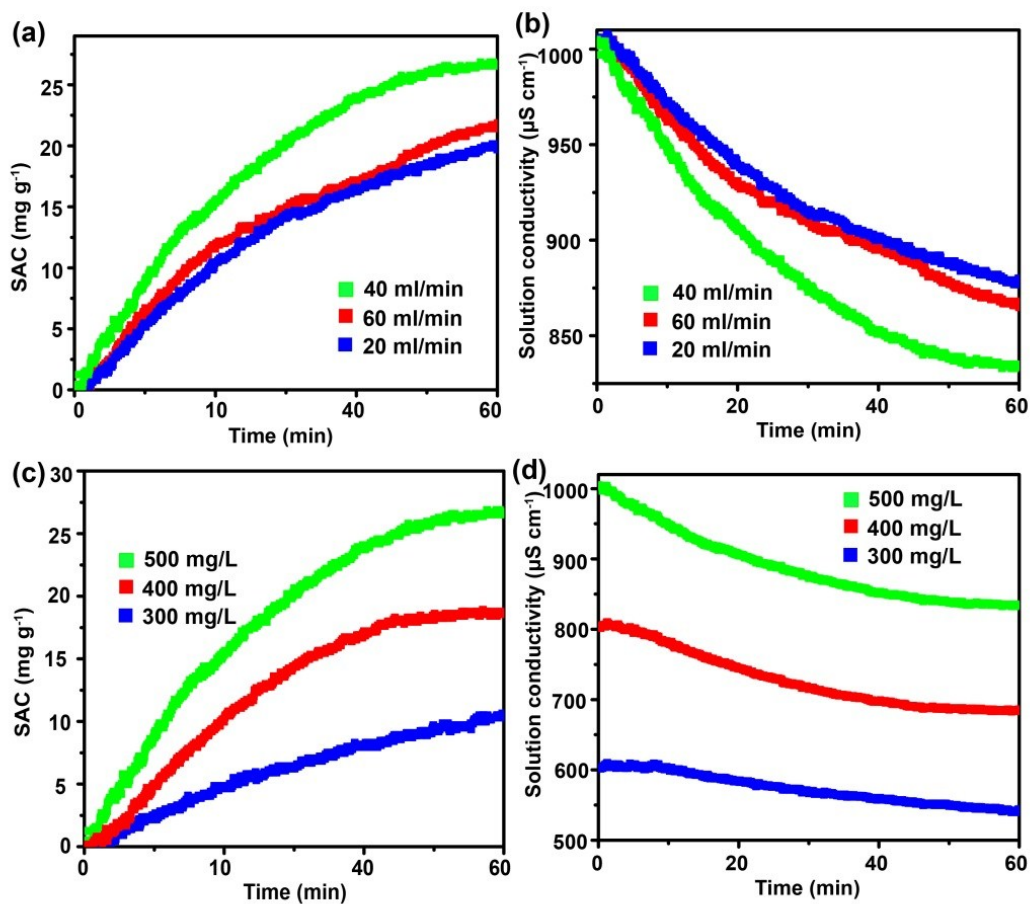

**Figure S5.** (a) Plots of SAC vs. time and (b) plots of solution conductivity vs. time for NP-3DHCA with different flow rates at 1.2 V and 500 mg/L. (c) Plots of SAC vs. time and (d) plots of solution conductivity vs. time for NP-3DHCA with different initial concentration at 1.2 V and 40 ml/min.

**Table S1.** Comparison of  $I_D/I_G$  between this work and the reported electrode materials.

| Electrode                             | $I_D/I_G$ | Reference |
|---------------------------------------|-----------|-----------|
| NP-3DHCA                              | 1.1       | This work |
| 3D graphene sphere                    | 1.05      | S1        |
| N doping hierarchical porous carbon   | 1.2       | S2        |
| N-doped hollow multiyolk@shell carbon | 1.0       | S3        |
| BMZIF-derived nanoporous carbon       | 1.11      | S4        |
| 3D hierarchical graphene              | 1.16      | S5        |

**Table S2.** SAC Comparison between reported carbon materials and this work.

| Carbon materials                          | SAC       | Reference |
|-------------------------------------------|-----------|-----------|
| 3D hierarchical carbon architectures      | 26.8 mg/g | This work |
| Carbon aerogels                           | 10.5 mg/g | S6        |
| Carbide-derived carbon                    | 15 mg/g   | S7        |
| N-doped carbon/graphene                   | 17.5 mg/g | S8        |
| Mesoporous carbon                         | 21 mg/g   | S9        |
| Macro-/micropores –dominated carbon       | 16.3 mg/g | S10       |
| N-doped activated carbon fiber networks   | 16.6 mg/g | S11       |
| Activated carbon derived from polyaniline | 14.9 mg/g | S12       |
| Porous carbon nanosheets                  | 15.6 mg/g | S13       |
| N-doped hollow mesoporous carbon spheres  | 16.6 mg/g | S14       |
| 3D nanoporous graphene                    | 18.4 mg/g | S15       |



## References

- (S1) Z. U. Khan, T. T. Yan, L. Y. Shi and D. S. Zhang, *Environ. Sci.: Nano*, 2018, **5**, 980-991.
- (S2) Z. Wang, T. T. Yan, L. Y. Shi and D. S. Zhang, *ACS Appl. Mater. Interfaces*, 2017, **9**, 15068-15078.
- (S3) H. Wang, T. T. Yan, L. Y. Shi, G. R. Chen, J. P. Zhang and D. S. Zhang, *ACS Sustain. Chem. Eng.*, 2017, **5**, 3329-3338.
- (S4) Z. Wang, T. T. Yan, J. H. Fang, L. Y. Shi and D. S. Zhang, *J. Mater. Chem. A*, 2016, **8**, 10858-10868.
- (S5) H. Wang, T. T. Yan, P. Y. Liu, G. R. Chen, L. Y. Shi, J. P. Zhang, Q. D. Zhong and D. S. Zhang, *J. Mater. Chem. A*, 2016, **4**, 4908-4919.
- (S6) R. Kumar, S. Sen Gupta, S. Katiyar, V. K. Raman, S. K. Varigala, T. Pradeep and A. Sharma, *Carbon*, 2016, **99**, 375-383.
- (S7) S. Porada, L. Borchardt, M. Oschatz, M. Bryjak, J. S. Atchison, K. J. Keesman, S. Kaskel, P. M. Biesheuvel and V. Presser, *Energ. Environ. Sci.*, 2013, **6**, 3700-3712.
- (S8) M. Wang, X. T. Xu, H. H. Song, J. Tang, S. J. Hou, M. S. A. Hossain, L. K. Pan and Y. Yamauchi, *Chem. Commun.*, 2017, **53**, 10784-10787.
- (S9) C. Tsouris, R. Mayes, J. Kiggans, K. Sharma, S. Yiacoumi, D. DePaoli and S. Dai, *Environ. Sci. Technol.*, 2011, **45**, 10243-10249.
- (S10) K. X. Tang, J. J. Chang,; H. B. Cao, C. L. Su, Y. P. Li, Z. S. Zhang and Y. Zhang, *ACS Sustain. Chem. Eng.*, 2017, **5**, 11324-11333.
- (S11) L. Zhang, Y. Liu, T. Lu and L. K. Pan, *J. Electroanal. Chem.*, 2017, **804**, 179-184.
- (S12) R. L. Zornitta, F. J. Garcia-Mateos, J. J. Lado, J. Rodriguez-Mirasol, T. Cordero, P. Hammer and L. A. M. Ruotolo, *Carbon*, 2017, **123**, 318-333.
- (S13) T. T. Wu, G. Wang, Q. Dong, F. Zhan, X. Zhang, S. F. Li, H. Y. Qiao and J. S. Qiu, *Environ. Sci. Technol.*, 2017, **53**, 9244-9251.
- (S14) Y. Li, J. W. Qi, J. S. Li, J. M. Shen, Y. X. Liu, X. Y. Sun, J. Y. Shen, W. Q. Han and L. J. Wang, *ACS Sustain. Chem. Eng.*, 2017, **5**, 6635-6644.
- (S15) A. G. El-Deen, R. M. Boom, H. Y. Kim, H. W. Duan, M. B. Chan-Park and J. H. Choi, *ACS Appl. Mater. Inter.*, 2017, **8**, 25313-25325.
